# Supplementary material for: Defining phenotypic and functional heterogeneity of glioblastoma stem cells by mass cytometry
Source: JCI Insight. 2021 Feb 22;6(4):e128456. doi: 10.1172/jci.insight.128456 (PMC7934942; doi:10.1172/jci.insight.128456)
Supplement: Supplemental data [file jciinsight-6-128456-s182.pdf]

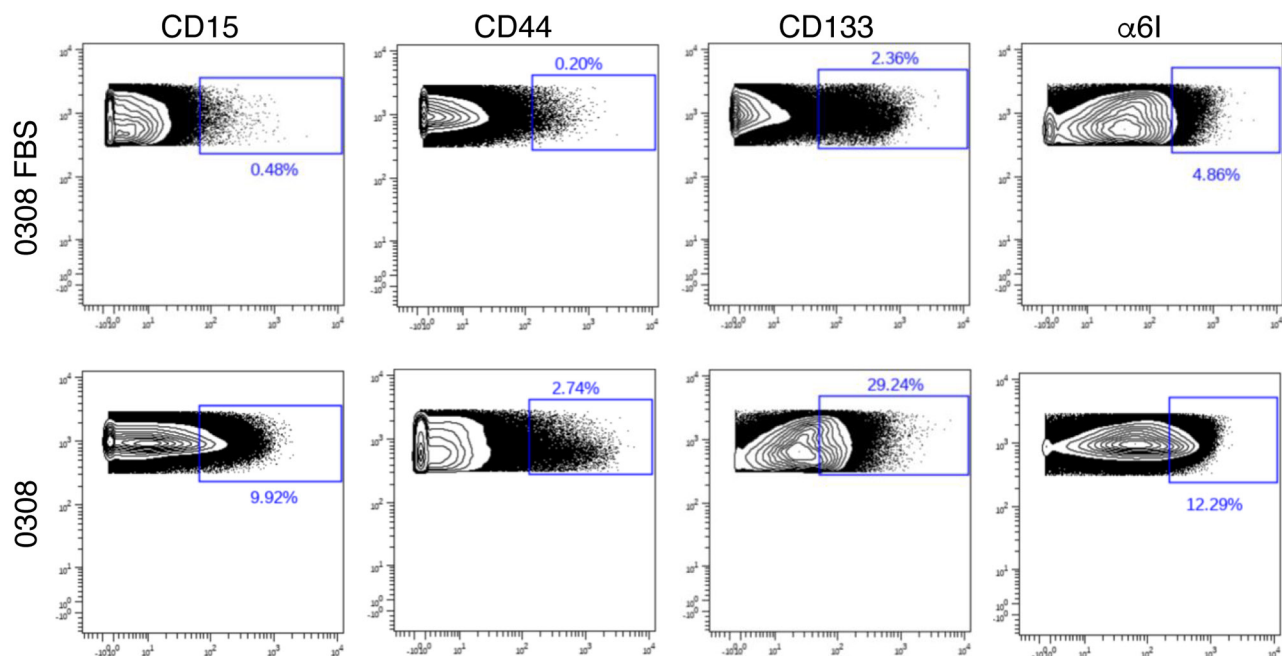

**Supplementary Figure 1. Mass cytometry gating strategy for surface marker expression.** 0308 GSC line grown in native media (0308) or in the presence of serum (0308 FBS, differentiating condition).

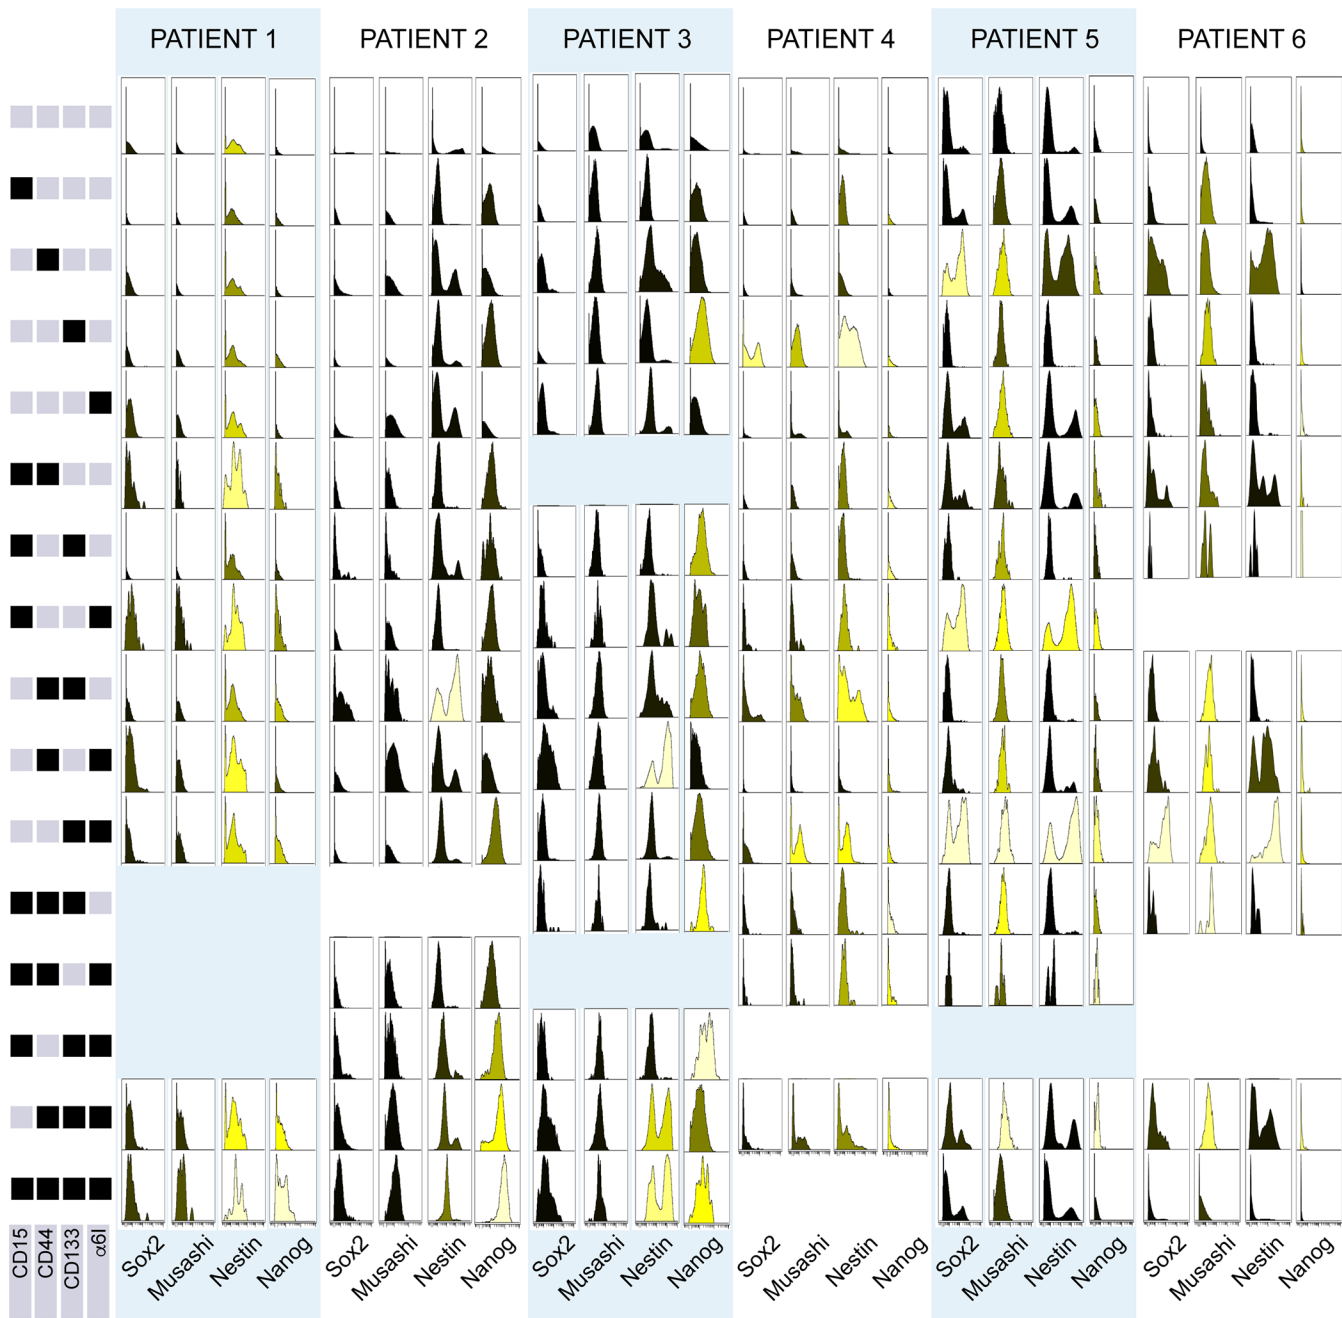

**Supplementary Figure 2. Intracellular neural stem cell-associated proteins are expressed in GSC subpopulations and non-GSCs.** Histograms indicate protein expression of four intracellular neural stem cell markers (Sox2, Musashi-1, Nestin, and Nanog) in GSC subpopulations from six different patient samples. Left panels show the levels (high, black; low, grey) of the GSC-associated surface markers for each subpopulation.

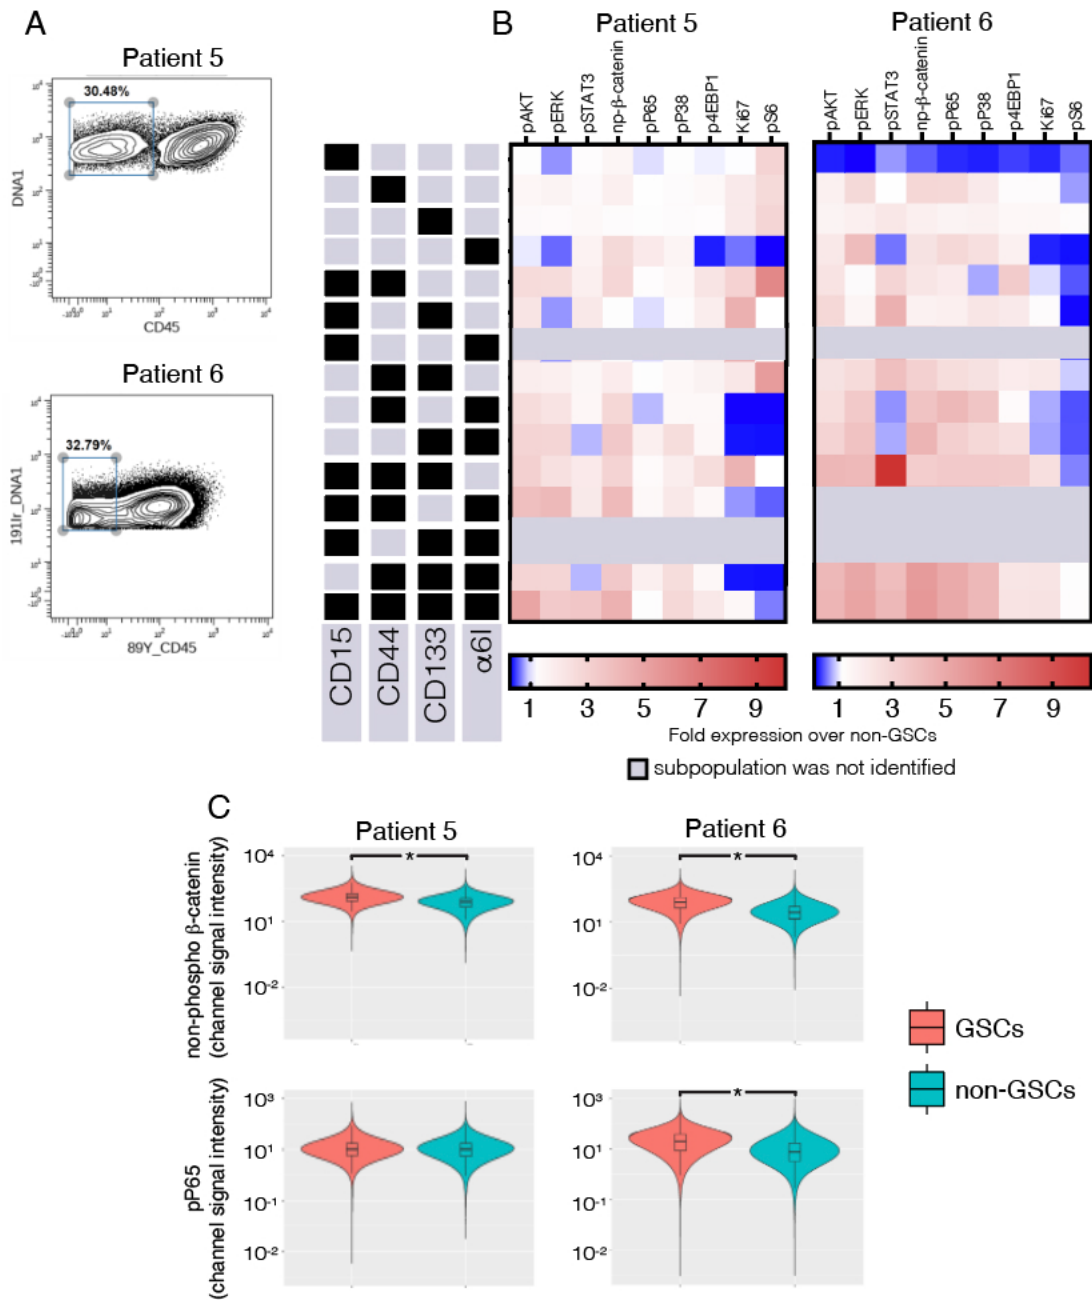

**Supplementary Figure 3. The patterns of intracellular signaling remain when CD45<sup>high</sup> cells are removed.** CD45 expression was assessed for samples from patients 5 and 6. **(A)** CD45 gating. **(B)** CD45<sup>low</sup>CD15<sup>high</sup>CD44<sup>high</sup>CD133<sup>high</sup>α6integrin<sup>high</sup> cells have increased activation of ERK and WNT pathways compared to most other GSC subpopulations **(C)** GSCs as a group have higher abundance of non-phospho-β-catenin and phospho-P65 than non-GSCs, after CD45<sup>high</sup> cells are removed. Kruskal-Wallis with Bonferroni post-hoc test was used; \* $P < 0.05$ .

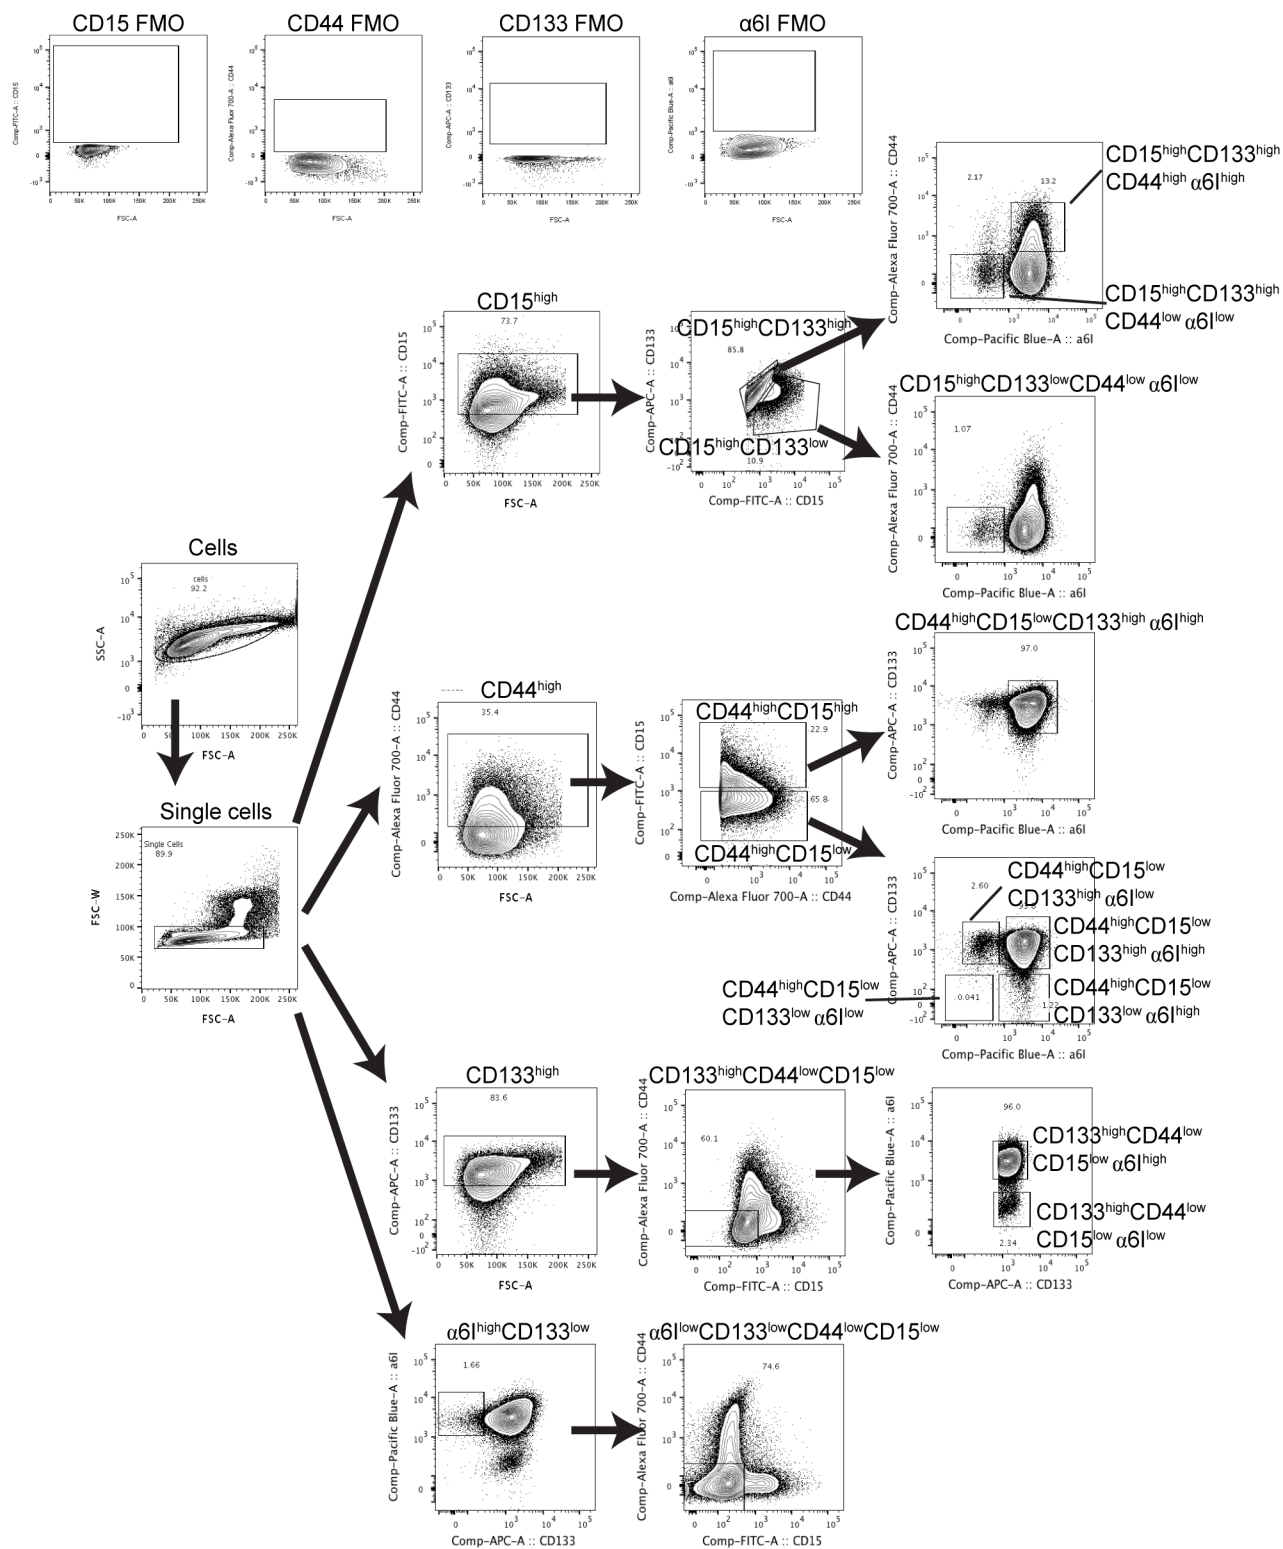

**Supplementary Figure 4. Gating strategy for sorting GSC subpopulations by cell surface markers.** Top panels indicate fluorescence minus one (FMO) controls used to determine the intensity of positive cells.

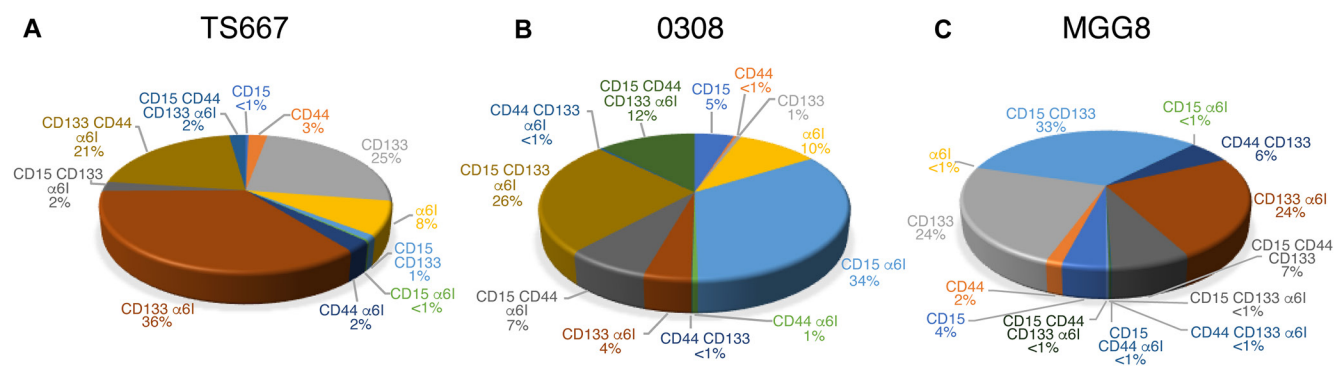

**Supplementary Figure 5. Thirteen GSC subpopulations were detected from cells in long-term stem cell media conditions.** Pie charts indicate the percentage of each GSC subpopulation relative to the total number of GSCs in (A) TS667, (B) 0308, (C) MGG8 patient-derived GSC lines.
